# Supplementary material
Source: publisher figshare collection journal article supplement (https://acs.figshare.com/ndownloader/files/3600786)
Supplement: Supplementary file 1 [file 3600786]

## Supporting Information

### Two regions of ryanodine receptor calcium channel are involved in $\text{Ca}^{2+}$ -dependent inactivation

Angela C. Gomez and Naohiro Yamaguchi

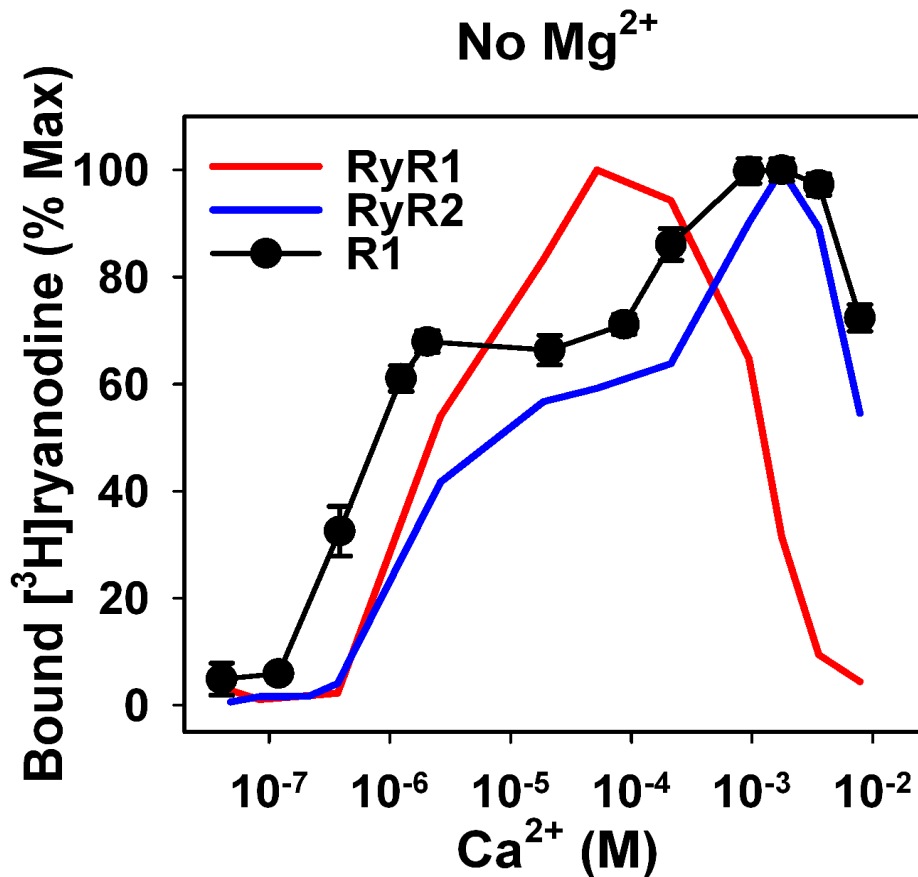

**FIGURE S1.  $\text{Ca}^{2+}$  dependent regulation of R1 chimera.**  $\text{Ca}^{2+}$  dependent channel activity of R1 chimera (filled circle) was determined by  $[^3\text{H}]$ ryanodine binding assays in the absence of  $\text{Mg}^{2+}$ . Solid red and blue lines represent mean values of WT-RyR1 and WT-RyR2 from Fig.1A, respectively.  $\text{EC}_{50}$  and  $\text{IC}_{50}$  values are  $0.8 \pm 0.1 \mu\text{M}$  and  $15.7 \pm 1.7 \text{ mM}$ , respectively. Data are mean  $\pm$  S.E. (n=6).

| Chimeras | $B_{\text{peak}}/B_{\text{max}}$ (%) |
|----------|--------------------------------------|
| WT-RyR1  | $35 \pm 5$                           |
| R0       | $36 \pm 4$                           |
| R21      | $51 \pm 7$                           |
| R41      | $47 \pm 3$                           |
| R51      | $48 \pm 7$                           |
| R41'     | $76 \pm 12$                          |
| R51'     | $33 \pm 3$                           |
| R61      | $38 \pm 9$                           |
| R71      | $56 \pm 13$                          |
| R81a     | $39 \pm 7$                           |
| R81b     | $57 \pm 9$                           |
| R81c     | $29 \pm 7$                           |
| R81d     | $45 \pm 6$                           |
| R91a     | $58 \pm 4$                           |
| R91b     | $48 \pm 5$                           |
| R101a    | $46 \pm 3$                           |
| R101b    | $40 \pm 3$                           |
| R121b    | $71 \pm 13$                          |
| R131b    | $66 \pm 8$                           |
| WT-RyR2  | $53 \pm 6$                           |

**TABLE S1. Activities of RyR chimeras.** Activities of wild type and chimera RyRs were obtained by normalizing the peak values of  $\text{Ca}^{2+}$  dependent activity to the  $B_{\text{max}}$  values ( $B_{\text{peak}}/B_{\text{max}}$ ). Data are mean  $\pm$  S.E. (n=4-9)
